# Supplementary material for: DHA and EPA Alleviate Epileptic Depression in PTZ-Treated Young Mice Model by Inhibiting Neuroinflammation through Regulating Microglial M2 Polarization and Improving Mitochondrial Metabolism
Source: MDPI journal article supplement (doi:10.3390/antiox12122079), 2023-12-06
Supplement: s1 [file s1]

**Table S1.** Ingredient and main fatty acid compositions of experimental diets

| <b>Ingredient(g/kg)</b>                      | <b>AIN93G</b> | <b>EPA</b> | <b>DHA</b> |
|----------------------------------------------|---------------|------------|------------|
| Corn starch                                  | 397.5         | 397.5      | 397.5      |
| Dextrin                                      | 132           | 132        | 132        |
| Sucrose                                      | 100           | 100        | 100        |
| Casein                                       | 200           | 200        | 200        |
| Powdered cellulose                           | 50            | 50         | 50         |
| Soybean oil                                  | 70            | 60         | 60         |
| Mineral mix                                  | 35            | 35         | 35         |
| Vitamin mix                                  | 10            | 10         | 10         |
| Choline bitartrate                           | 2.5           | 2.5        | 2.5        |
| L- Cystine                                   | 3             | 3          | 3          |
| EPA ethyl ester                              | -             | 10         | -          |
| DHA ethyl ester                              | -             | -          | 10         |
| t- butylhydroquinone                         | 0.014         | 0.014      | 0.014      |
| Fatty acids composition (%)                  |               |            |            |
| C16 :0                                       | 11.76         | 9.6        | 10.18      |
| C18 :0                                       | 4.06          | 3.3        | 3.61       |
| C18 :1                                       | 23.9          | 19.4       | 20.3       |
| C18 :2n-6                                    | 48.68         | 38.0       | 40.25      |
| C18 :3n-3                                    | 5.72          | 4.5        | 4.79       |
| C20 :4n-6                                    | -             | 1.1        | -          |
| C20 :5                                       | -             | 17.0       | -          |
| C22 :6                                       | -             | 2.2        | 17.31      |
| Note :“-”, none detected. aModified AIN-93G. |               |            |            |
